# Supplementary material for: The importance of interacting climate modes on Australia’s contribution to global carbon cycle extremes
Source: PubMed Central journal article supplement (PMC4791548; doi:10.1038/srep23113), 2016-03-15
Supplement: srep23113-s1.pdf [file srep23113-s1.pdf]

1  
2  
3  
  
4  
5  
  
6  
7  
  
8  
9  
  
10  
  
11  
  
12  
13  
  
14  
15  
  
16

**Supplementary information**  
**The importance of interacting climate modes on Australia's contribution to global carbon cycle extremes**

James CLEVERLY\*<sup>1,2</sup>, Derek EAMUS<sup>1,2</sup>, Qunying LUO<sup>3</sup>, Natalia RESTREPO COUPE<sup>3</sup>, Natascha KLJUN<sup>4</sup>, Xuanlong MA<sup>3</sup>, Cacilia EWENZ<sup>5</sup>, Longhui LI<sup>1</sup>, Qiang YU<sup>1</sup> and Alfredo HUETE<sup>3</sup>

<sup>1</sup> School of Life Sciences, University of Technology Sydney, PO Box 123, Broadway, NSW, 2007, Australia

<sup>2</sup> Australian Supersite Network, Terrestrial Ecosystem Research Network, University of Technology Sydney

<sup>3</sup> Climate Change Cluster, University of Technology Sydney

<sup>4</sup> Department of Geography, Swansea University, Singleton Park, Swansea SA2 8PP, UK

<sup>5</sup> Airborne Research Australia, Flinders University, PO Box 335, Salisbury, South Australia, 5106, Australia

\*Correspondence: James.Cleverly@UTS.edu.au, +61 (02) 9514 8405, +61 (02) 9514 4079 (FAX)

17

**Extended Data Table 1** | Wavelet-based principal components analysis statistics.

| Date range | wPC1<br>(% of total)                           | wPC2<br>(% of total)                           |
|------------|------------------------------------------------|------------------------------------------------|
| 1982–1998  | 0.99 SAMI – 0.16 Niño3.4 – 0.03 DMI<br>(70.5)  | –0.16 SAMI – 0.95 Niño3.4 – 0.25 DMI<br>(24.6) |
| 1998–2013  | –0.99 SAMI + 0.17 Niño3.4 + 0.04 DMI<br>(80.2) | –0.17 SAMI – 0.98 Niño3.4 – 0.05 DMI<br>(15.7) |
| 1982–2013  | –0.93 SAMI + 0.24 Niño3.4 – 0.28 DMI<br>(>99)  |                                                |

18

19

20

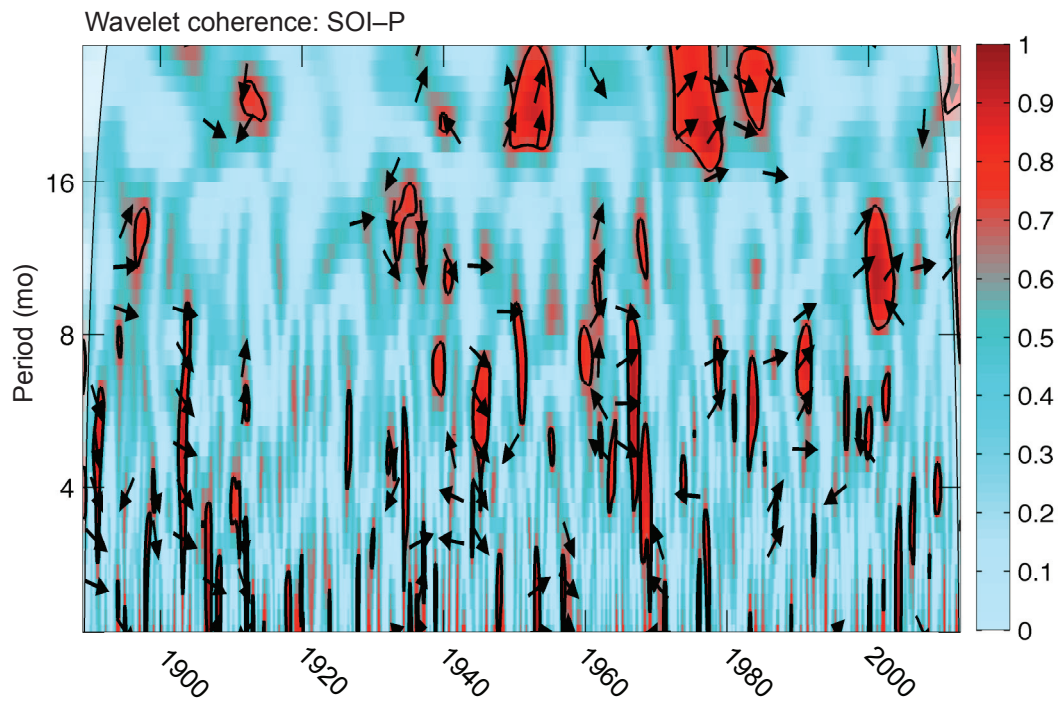

Supplementary Figure 1. Relationship between local precipitation  $P$  and the southern oscillation index (SOI). Frequency-time coordinates of significant coherence (i.e., squared correlation) are outlined. Arrows indicate phase (leftward:  $180^\circ$  out-of-phase; rightward:  $0^\circ$  in-phase) and degree of lead or lag (upward or downward) between SOI and  $P$ . The cone of influence is shown near the top corners of the plot.

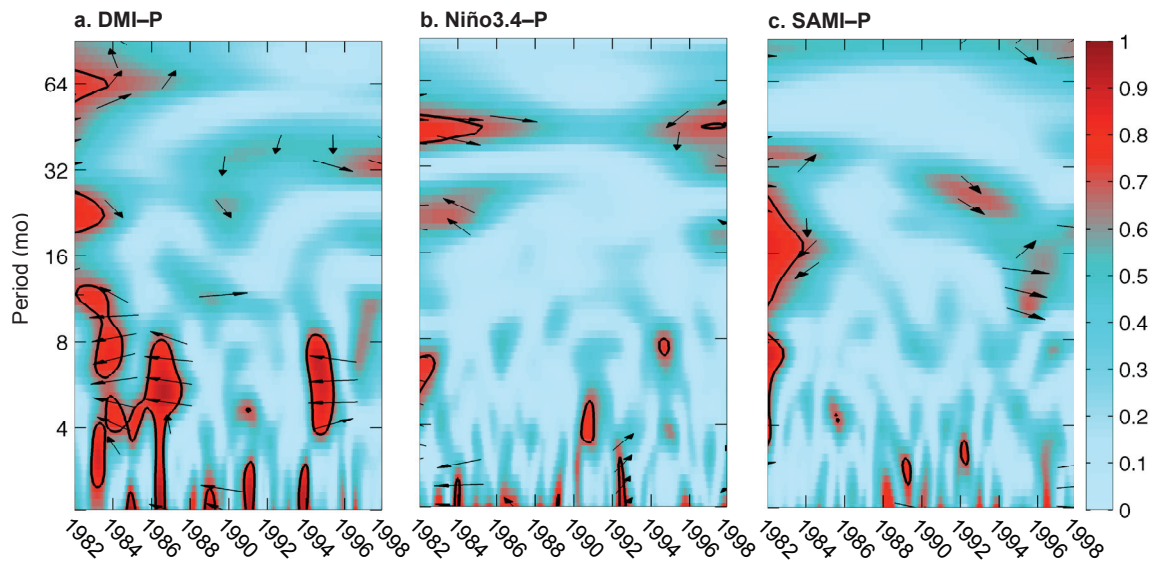

Supplementary Figure 2. Relationship between local precipitation P and climate modes: (a) dipole mode index (DMI), (b) Niño3.4 and (c) southern oscillation mode index (SAMI). The time period shown when significant correlations between P and the combined climate index (wPC1) were absent (cf. Fig. 3). Frequency-time coordinates of significant coherence (i.e., squared correlation) are outlined. Arrows indicate phase (leftward: 180° out-of-phase; rightward: 0° in-phase) and degree of lead or lag (upward or downward) between Niño3.4 and P. The cone of influence was outside domain plot's domain.

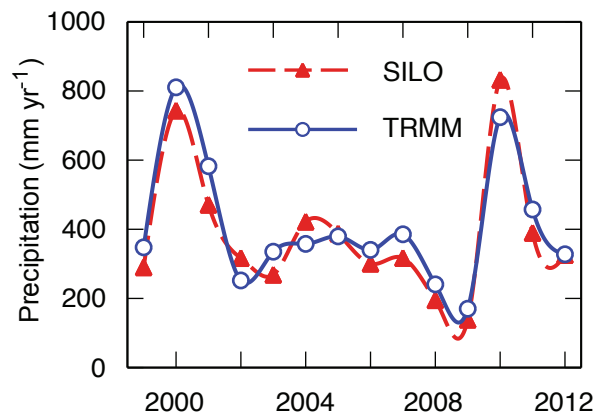

Supplementary Figure 3. Thirteen-year record of precipitation from SILO patched point observations (triangles and dashed red line) or TRMM satellite data (circles and solid blue line).
